# Supplementary material for: Copper cyanide polymers with controllable dimensions modulated by rigid and flexible bis-(imidazole) ligands: synthesis, crystal structure and fluorescence properties
Source: Royal Society of Chemistry journal article supplement (doi:10.1039/c8ce01769g), 2019-01-01
Supplement: c8ce01769g1.pdf [file c8ce01769g1.pdf]

*Electronic Supplementary Material*

**Controllable dimensions copper cyanide polymers modulated by rigid and flexible bis-(imidazole) ligands: synthesis, crystal structure and fluorescence properties**

Hui Xu,<sup>ab</sup> Bo-Yu Zhou,<sup>c</sup> Kai Yu,<sup>b</sup> Zhan-Hua Su,<sup>b</sup> Bai-Bin Zhou,<sup>\*b</sup> and Zhong-Min Su<sup>\*a</sup>

<sup>a</sup>*College of Chemistry, Jilin University, Changchun, 130012, PR China;*

<sup>b</sup>*Key Laboratory for Photonic and Electronic Bandgap Materials, Ministry of Education, Harbin Normal University, Harbin 150025, People's Republic of China;*

<sup>c</sup>*Institute of Nuclear Physics and Chemistry, China Academy of Engineering Physics, Mianyang 621900, Sichuan, China;*

## 1. Structural figures

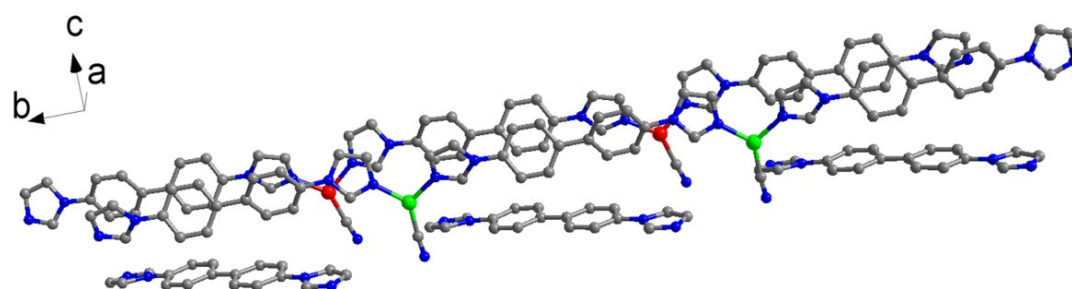

**Fig. S1** The 1D parallel chains of polymer 1 along crystallographic *a*-axis. (All H atoms were omitted for clarity).

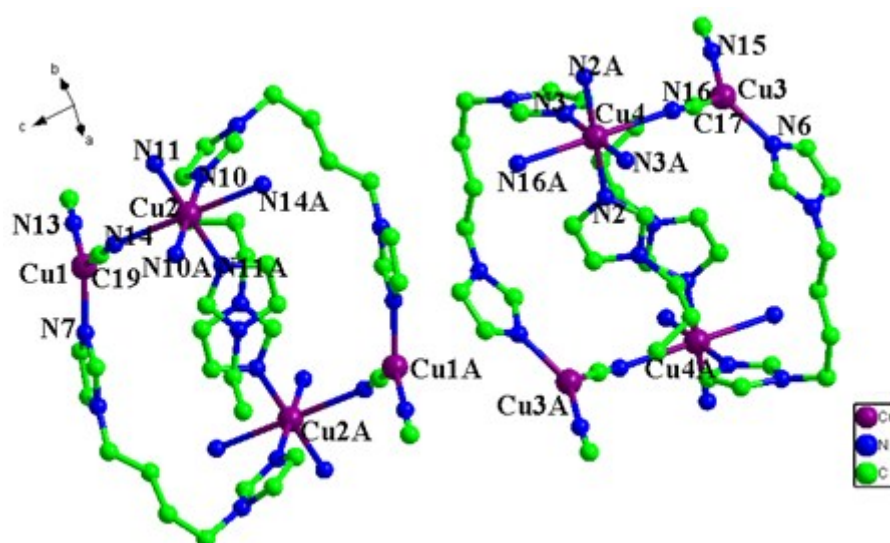

**Fig. S2** View of the coordination environments of Cu atoms in polymer 2.

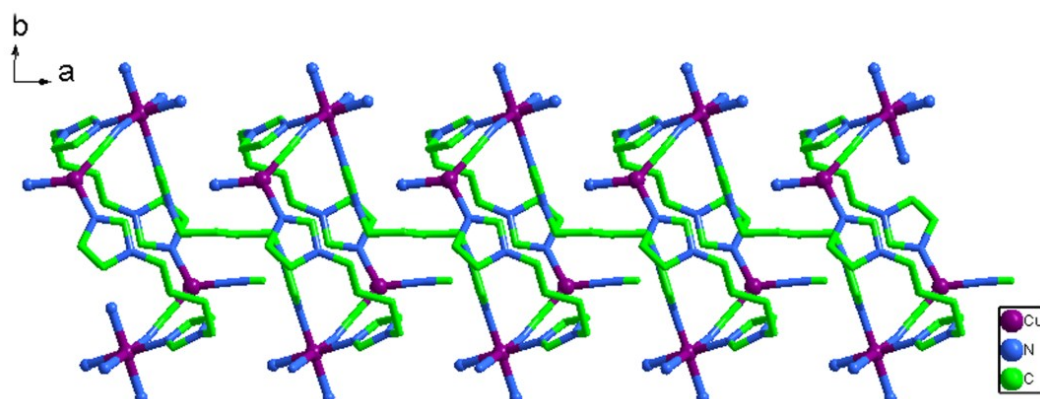

**Fig. S3** The 1D chain shown from *a* direction in polymer 2.

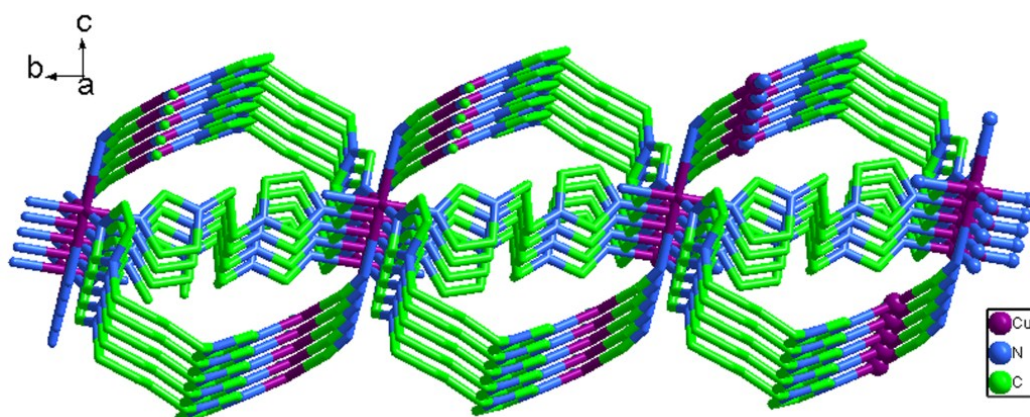

Fig. S4 View of 2D layer structures of polymer 2 along the crystallographic *a* axis.

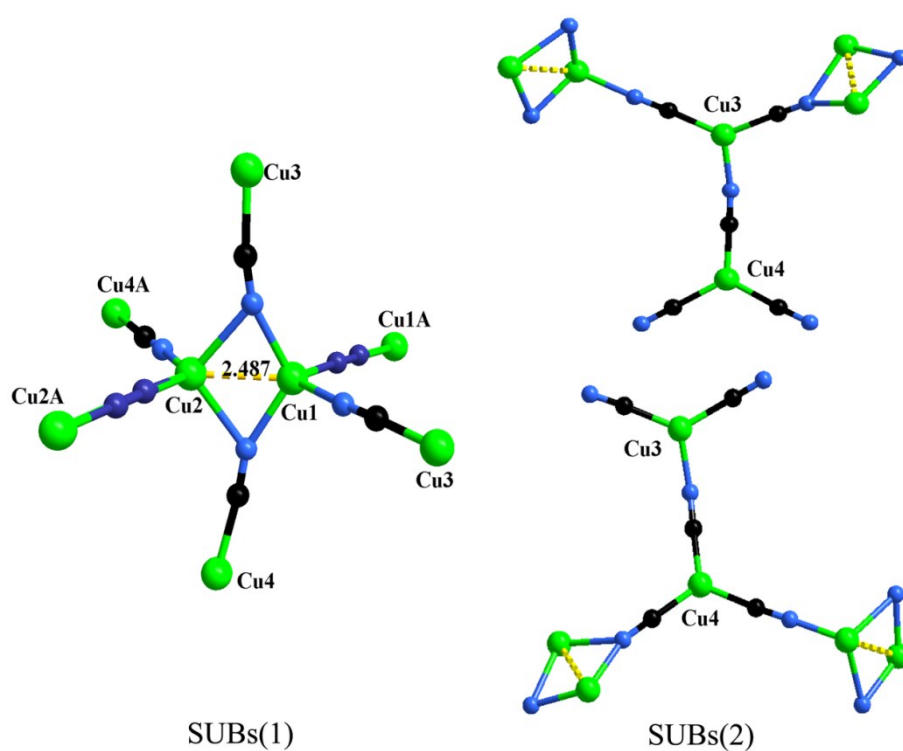

Fig. S5 Two kinds of secondary building units in polymer 3.

## 2. Physical characterization

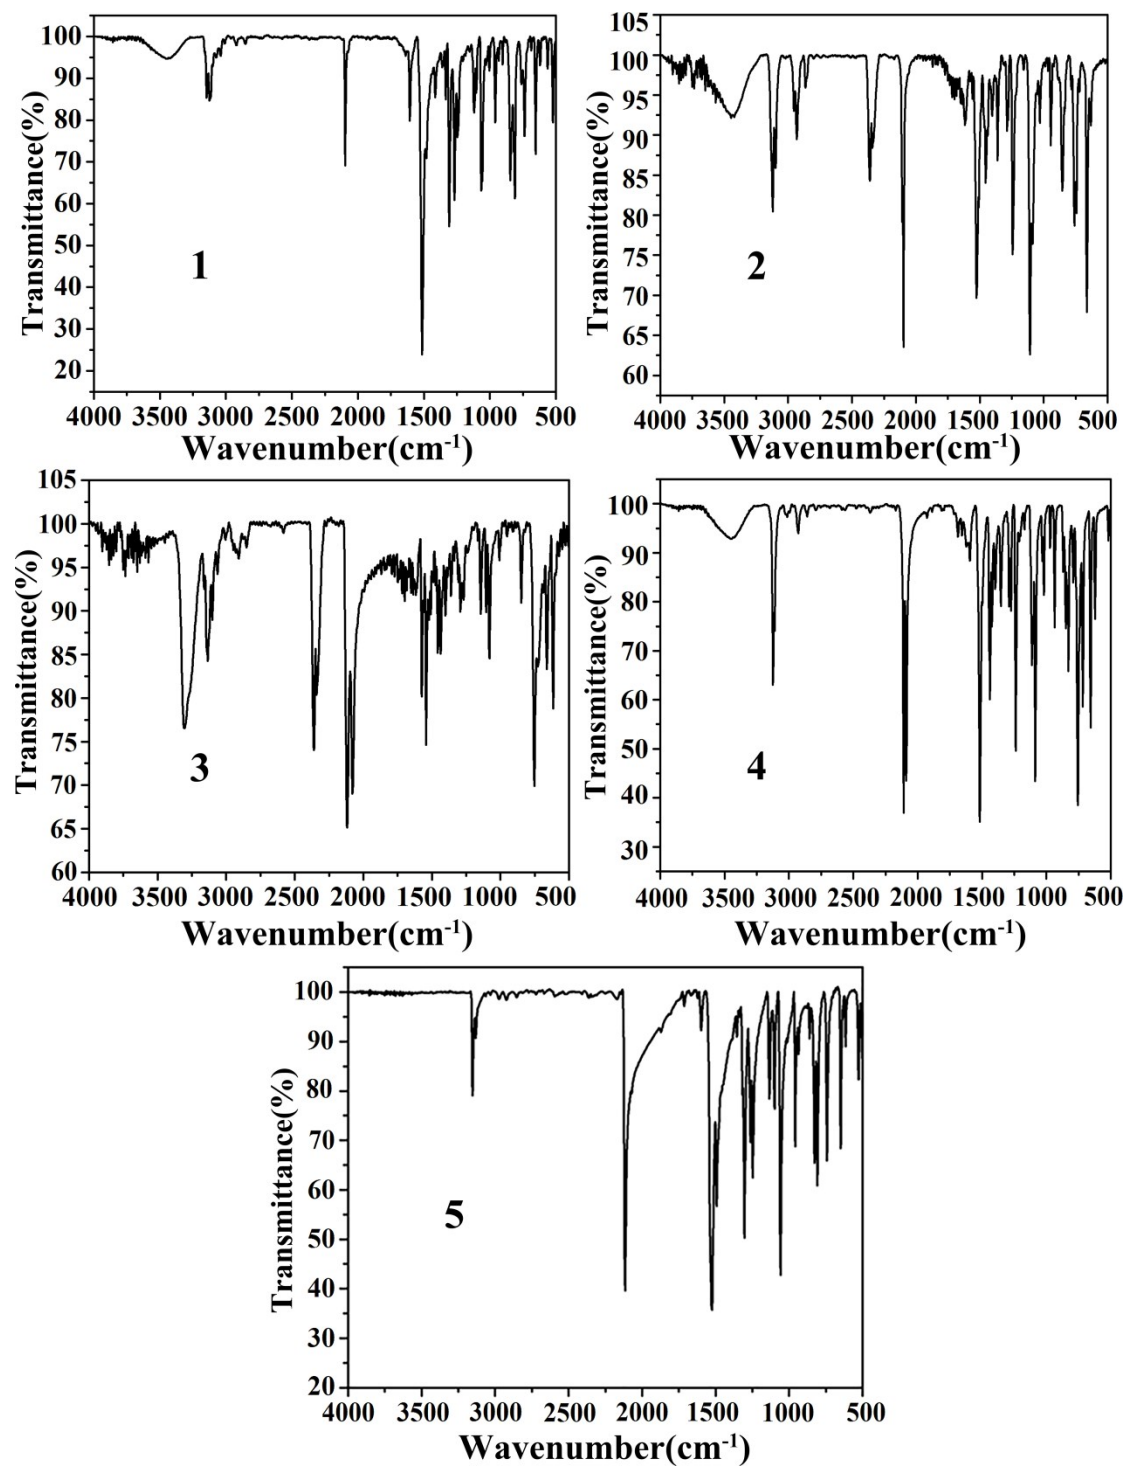

Fig. S6 IR spectra of 1-5.

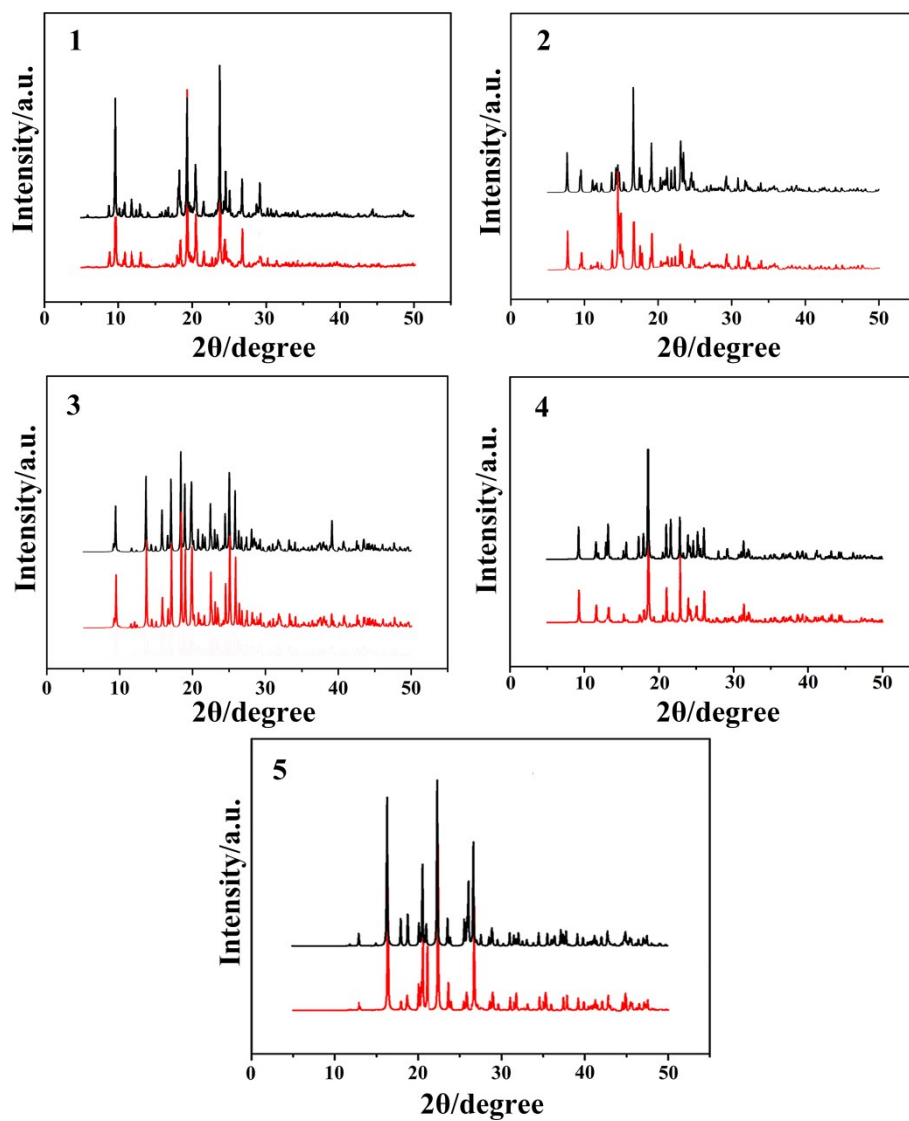

Fig. S7 PXR contrast curves of 1-5.

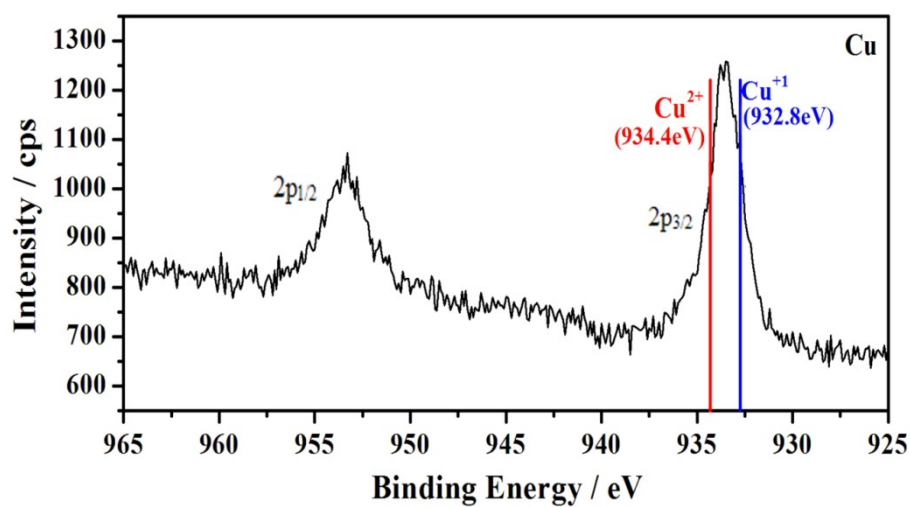

Fig. S8 The XPS spectra of polymer 2.

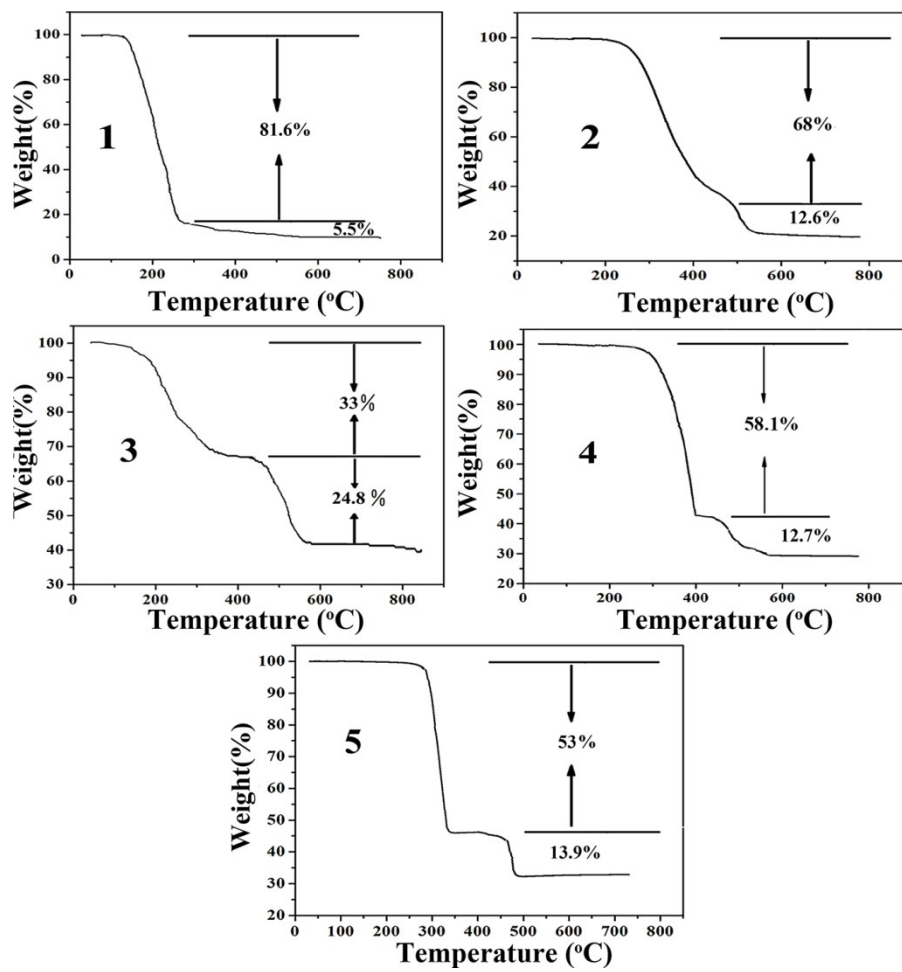

Fig. S9 TG curves of polymers 1-5.

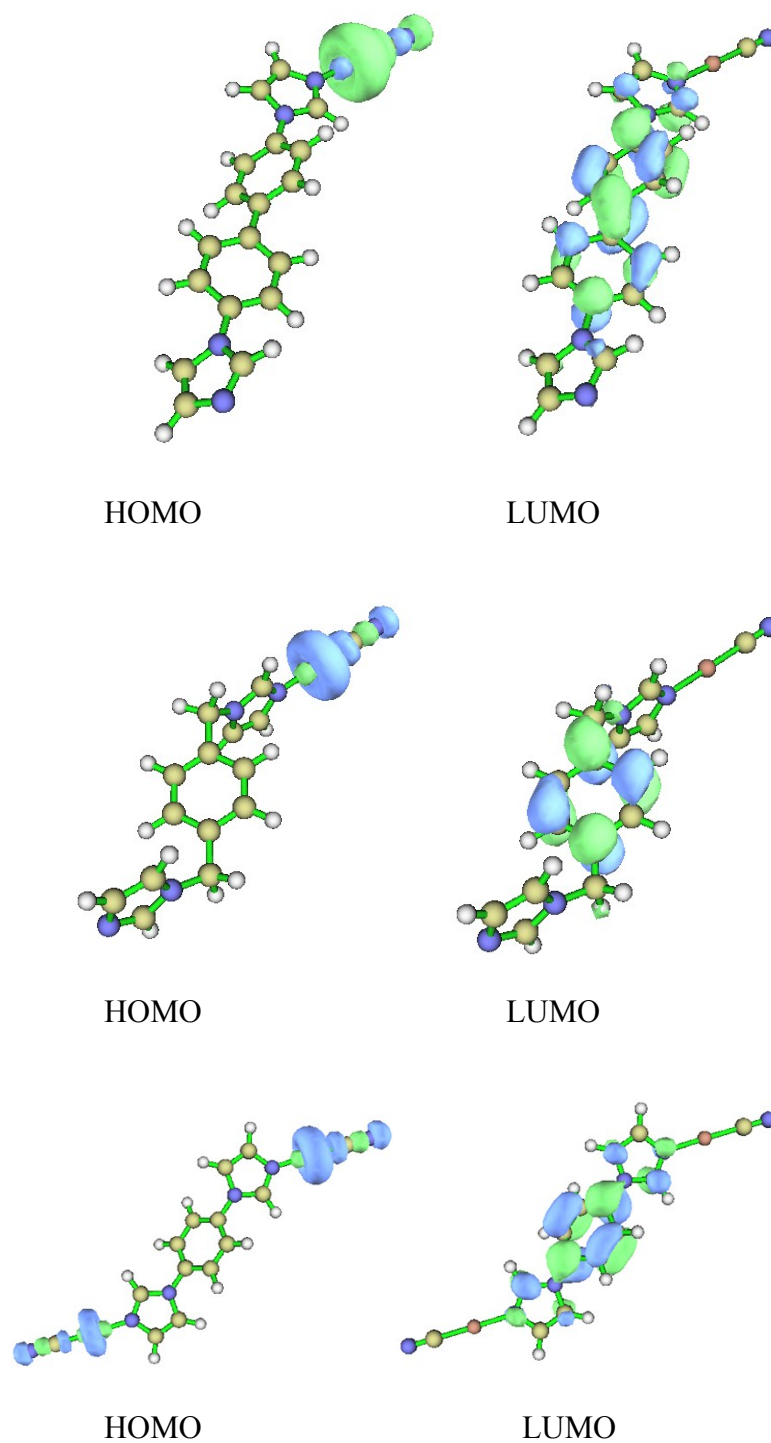

**Fig. S10** Electron-density distribution of the lowest unoccupied and highest occupied orbitals calculated for **1** (top), **4** (middle) and **5** (bottom).

**Table S1.** Crystal data for polymers **1-5**

| Polymer                                                                                  | 1                                                               | 2                                                               | 3                                                                     | 4                                                              | 5                                              |
|------------------------------------------------------------------------------------------|-----------------------------------------------------------------|-----------------------------------------------------------------|-----------------------------------------------------------------------|----------------------------------------------------------------|------------------------------------------------|
| Chemical formula                                                                         | C <sub>56</sub> H <sub>42</sub> Cu <sub>2</sub> N <sub>14</sub> | C <sub>34</sub> H <sub>42</sub> Cu <sub>3</sub> N <sub>16</sub> | C <sub>16.62</sub> H <sub>18</sub> Cu <sub>4</sub> N <sub>10.38</sub> | C <sub>16</sub> H <sub>14</sub> Cu <sub>2</sub> N <sub>6</sub> | C <sub>7</sub> H <sub>5</sub> CuN <sub>3</sub> |
| Formula weight                                                                           | 1038.14                                                         | 865.49                                                          | 617.37                                                                | 417.43                                                         | 194.69                                         |
| Cryst. size, mm <sup>3</sup>                                                             | 0.29 x 0.26 x 0.18                                              | 0.280x0.260 x 0.180                                             | 0.240 x 0.220 x 0.220                                                 | 0.36 x 0.28 x 0.30                                             | 0.28 x0.25 x0.19                               |
| Crystal system                                                                           | Monoclinic                                                      | Triclinic                                                       | Orthorhombic                                                          | Monoclinic                                                     | Monoclinic                                     |
| Space group                                                                              | <i>P2<sub>1</sub>/c</i>                                         | <i>P-1</i>                                                      | <i>P2<sub>1</sub>2<sub>1</sub>2</i>                                   | <i>P2<sub>1</sub>/n</i>                                        | <i>C 2/C</i>                                   |
| <i>a</i> , Å                                                                             | 15.071(3)                                                       | 8.0872(5)                                                       | 13.0156(6)                                                            | 8.8138(18)                                                     | 11.089(7)                                      |
| <i>b</i> , Å                                                                             | 17.319(4)                                                       | 10.2331(6)                                                      | 14.3792(7)                                                            | 15.406                                                         | 8.790(5)                                       |
| <i>c</i> , Å                                                                             | 18.468(4)                                                       | 23.4179(13)                                                     | 12.3581(6)                                                            | 12.203                                                         | 15.236(9)                                      |
| <i>α</i>                                                                                 | 90                                                              | 88.4500(10)                                                     | 90                                                                    | 90                                                             | 90                                             |
| <i>β</i> , deg                                                                           | 96.99(3)                                                        | 80.9560(10)                                                     | 90                                                                    | 94.92(3)                                                       | 102.882(11)                                    |
| <i>γ</i>                                                                                 | 90                                                              | 86.5680                                                         | 90                                                                    | 90                                                             | 90                                             |
| <i>V</i> (Å <sup>3</sup> )                                                               | 4784.6(18)                                                      | 1910.17(19)                                                     | 2312.87(19)                                                           | 1650.9(6)                                                      | 1447.6(15)                                     |
| <i>Z</i>                                                                                 | 4                                                               | 2                                                               | 4                                                                     | 4                                                              | 8                                              |
| <i>D</i> <sub>calc</sub> /Mg m <sup>-3</sup>                                             | 1.441                                                           | 1.505                                                           | 1.773                                                                 | 1.679                                                          | 1.786                                          |
| <i>μ</i> (MoKα), mm <sup>-1</sup>                                                        | 0.945                                                           | 1.704                                                           | 3.654                                                                 | 2.585                                                          | 2.941                                          |
| <i>F</i> (000), e                                                                        | 2580                                                            | 1032                                                            | 688                                                                   | 1071                                                           | 776.0                                          |
| <i>θ</i> range, deg/°                                                                    | 1.36- 27.24                                                     | 2.17- 28.37                                                     | 2.17 - 28.34                                                          | 2.64-27.41                                                     | 2.74-28.23                                     |
| Reflections                                                                              | 27259/10716/                                                    | 17744 /9557/                                                    | 14112 / 5788/                                                         | 9446 / 3769 /                                                  | 4389 / 1758/                                   |
| collected/unique/ <i>R</i> <sub>int</sub>                                                | 0.0398                                                          | 0.0272                                                          | 0.0272                                                                | 0.0220                                                         | 0.0283                                         |
| Data/restraints/                                                                         | 10505 / 0 /                                                     | 9251 / 0 /                                                      | 5758 / 0 /                                                            | 3722 / 0 /                                                     | 1758/0/                                        |
| parameters                                                                               | 649                                                             | 481                                                             | 281                                                                   | 217                                                            | 101                                            |
| <i>R</i> <sub>1</sub> / <i>wR</i> <sub>2</sub> [ <i>I</i> ≥ 2σ( <i>I</i> )] <sup>a</sup> | 0.0458 / 0.1051                                                 | 0.0447 / 0.0970                                                 | 0.0372/ 0.0793                                                        | 0.0295/0.0754                                                  | 0.0291/0.0765                                  |
| GOF on <i>F</i> <sup>2</sup>                                                             | 1.015                                                           | 1.012                                                           | 1.015                                                                 | 1.060                                                          | 1.059                                          |
| Δρ <sub>fin</sub> (max/min), eÅ <sup>-3</sup>                                            | 0.488/ -0.346                                                   | 0.536/ -0.376                                                   | 0.575/ -0.391                                                         | 0.442/-0.502                                                   | 0.460/-0.288                                   |

$$^a R_1 = \sum ||F_o| - |F_c|| / \sum |F_o|; wR_2 = \sum [w(F_o^2 - F_c^2)^2] / \sum [w(F_o^2)^2]^{1/2}$$

**Table S2.** Selected bond lengths (Å) and bond angles (°) for polymers **1-5**

| Polymer 1        |            |                 |            |
|------------------|------------|-----------------|------------|
| Cu(1)-C(38)      | 1.883(3)   | Cu(2)-C(1)      | 1.879(3)   |
| Cu(1)-N(7)       | 1.971(2)   | Cu(2)-N(2)      | 2.002(2)   |
| Cu(1)-N(8)       | 2.059(2)   | Cu(2)-N(3)      | 2.012(2)   |
| C(38)-Cu(1)-N(7) | 140.88(11) | C(1)-Cu(2)-N(3) | 124.82(12) |
| C(38)-Cu(1)-N(8) | 115.02(11) | C(1)-Cu(2)-N(2) | 129.78(12) |
| N(7)-Cu(1)-N(8)  | 104.04(10) | N(2)-Cu(2)-N(3) | 105.26(10) |



---

**Polymer 2**

---

|                       |            |                     |            |
|-----------------------|------------|---------------------|------------|
| Cu(1)-C(19)           | 1.924(3)   | Cu(3)-N(6)          | 2.056(3)   |
| Cu(1)-N(7)            | 2.024(3)   | Cu(3)-N(15)         | 1.998(4)   |
| Cu(1)-N(13)           | 2.024(4)   | Cu(3)-C(17)         | 1.929(4)   |
| Cu(2)-N(11)#1         | 2.022(2)   | Cu(4)-N(3)          | 2.025(2)   |
| Cu(2)-N(11)           | 2.022(2)   | Cu(4)-N(3)#2        | 2.025(2)   |
| Cu(2)-N(10)           | 2.027(2)   | Cu(4)-N(2)          | 2.026(2)   |
| Cu(2)-N(10)#1         | 2.027(2)   | Cu(4)-N(2)#2        | 2.026(2)   |
| Cu(2)-N(14)           | 2.552      | Cu(4)-N(16)         | 2.528      |
| C(19)-Cu(1)-N(7)      | 114.82(11) | C(17)-Cu(3)-N(15)   | 131.72(12) |
| C(19)-Cu(1)-N(13)     | 131.25(12) | C(17)-Cu(3)-N(6)    | 110.59(11) |
| N(7)-Cu(1)-N(13)      | 113.53(11) | N(15)-Cu(3)-N(6)    | 117.65(12) |
| N(11)-Cu(2)-N(11)#1   | 180.00(14) | N(3)#2-Cu(4)-N(3)   | 180.0      |
| N(11)-Cu(2)-N(10)     | 88.26(9)   | N(3)#2-Cu(4)-N(2)   | 91.38(9)   |
| N(11)#1-Cu(2)-N(10)   | 91.74(9)   | N(3)-Cu(4)-N(2)     | 88.62(9)   |
| N(11)-Cu(2)-N(10)#1   | 91.74(9)   | N(3)#2-Cu(4)-N(2)#2 | 88.62(9)   |
| N(11)#1-Cu(2)-N(10)#1 | 88.26(9)   | N(3)-Cu(4)-N(2)#2   | 91.38(9)   |
| N(10)-Cu(2)-N(10)#1   | 180.00(12) | N(2)-Cu(4)-N(2)#2   | 180.00(14) |

---

---

**Polymer 3**

---

|                  |            |                     |            |
|------------------|------------|---------------------|------------|
| Cu(1)-N(8)       | 1.971(4)   | Cu(2)-N(5)          | 2.294(5)   |
| Cu(1)-N(7)       | 2.006(4)   | Cu(3)-C(14)#1       | 1.881(4)   |
| Cu(1)-N(5)       | 2.031(5)   | Cu(3)-N(11)         | 1.947(5)   |
| Cu(1)-N(6)       | 2.047(5)   | Cu(3)-C(13)         | 1.904(4)   |
| Cu(2)-N(10)      | 1.925(4)   | Cu(4)-C(15)#2       | 1.904(4)   |
| Cu(2)-N(9)       | 1.934(5)   | Cu(4)-C(16)         | 1.909(4)   |
| Cu(2)-N(6)       | 2.225(4)   | Cu(4)-C(12)         | 1.878(5)   |
| N(8)-Cu(1)-N(7)  | 107.13(16) | N(10)-Cu(2)-N(5)    | 101.48(17) |
| N(8)-Cu(1)-N(5)  | 109.30(16) | N(9)-Cu(2)-N(5)     | 109.27(15) |
| N(7)-Cu(1)-N(5)  | 108.95(16) | N(6)-Cu(2)-N(5)     | 100.95(17) |
| N(8)-Cu(1)-N(6)  | 107.83(17) | C(14)#1-Cu(3)-C(13) | 129.19(17) |
| N(7)-Cu(1)-N(6)  | 105.72(15) | C(14)#1-Cu(3)-N(11) | 120.91(18) |
| N(5)-Cu(1)-N(6)  | 117.43(17) | C(13)-Cu(3)-N(11)   | 109.84(17) |
| N(10)-Cu(2)-N(9) | 124.60(17) | C(15)#2-Cu(4)-C(16) | 119.03(17) |
| N(10)-Cu(2)-N(6) | 104.72(17) | C(15)#2-Cu(4)-C(12) | 119.79(19) |
| N(9)-Cu(2)-N(6)  | 112.85(16) | C(16)-Cu(4)-C(12)   | 121.16(18) |

---

Polymer 4

|                    |            |                      |           |
|--------------------|------------|----------------------|-----------|
| Cu(1)-C(8)         | 1.924(2)   | Cu(1)-Cu(1)#2        | 2.5766(8) |
| Cu(1)-N(8)         | 2.007(2)   | Cu(2)-C(9)           | 1.896(2)  |
| Cu(1)-N(1)         | 2.0458(19) | Cu(2)-N(7)           | 1.916(2)  |
| Cu(1)-C(8)#2       | 2.476(3)   | Cu(2)-N(3)           | 2.058(2)  |
| C(8)-Cu(1)-N(8)    | 121.28(9)  | N(8)-Cu(1)-Cu(1)#2   | 128.61(7) |
| C(8)-Cu(1)-N(1)    | 123.45(9)  | N(1)-Cu(1)-Cu(1)#2   | 119.54(6) |
| N(8)-Cu(1)-N(1)    | 99.08(8)   | C(8)#2-Cu(1)-Cu(1)#2 | 44.71(5)  |
| C(8)-Cu(1)-C(8)#2  | 109.59(7)  | C(9)-Cu(2)-N(7)      | 143.74(9) |
| N(8)-Cu(1)-C(8)#2  | 104.24(9)  | C(9)-Cu(2)-N(3)      | 111.92(9) |
| N(1)-Cu(1)-C(8)#2  | 94.86(8)   | N(7)-Cu(2)-N(3)      | 104.32(8) |
| C(8)-Cu(1)-Cu(1)#2 | 64.87(7)   |                      |           |

Polymer 5

|                   |            |                   |            |
|-------------------|------------|-------------------|------------|
| C(7)-Cu(1)        | 1.860(2)   | N(3)-Cu(1)-N(2)   | 98.22(9)   |
| N(3)-Cu(1)        | 1.980(2)   | C(7)#2-N(3)-Cu(1) | 164.12(18) |
| Cu(1)-N(2)        | 1.993(19)  | C(7)-Cu(1)-N(3)   | 125.16(9)  |
| N(3)#1-C(7)-Cu(1) | 174.63(19) | C(7)-Cu(1)-N(2)   | 136.61(8)  |

**Table S3.** Bond-valence sum calculations values in polymer 2

| Bond type   | Bond distance/Å | Bond valence I | Bond valence II | Bond valence sum |
|-------------|-----------------|----------------|-----------------|------------------|
| Cu(1)-N(7)  | 2.024(3)        | 0.297          |                 | 1.068 for Cu1    |
| Cu(1)-N(13) | 2.024(4)        | 0.297          |                 |                  |
| Cu(1)-C(19) | 1.924(3)        | 0.474          |                 |                  |
| Cu(3)-N(6)  | 2.056(3)        | 0.272          |                 | 1.058 for Cu3    |
| Cu(3)-N(15) | 1.998(4)        | 0.318          |                 |                  |
| Cu(3)-C(17) | 1.929(4)        | 0.468          |                 |                  |
| Cu(2)-N(11) | 2.022(2)        |                | 0.298           | 1.338 for Cu2    |
| Cu(2)-N(10) | 2.027(2)        |                | 0.294           |                  |
| Cu(2)-N(14) | 2.552           |                | 0.077           |                  |
| Cu(4)-N(3)  | 2.025(2)        |                | 0.296           | 1.334 for Cu4    |
| Cu(4)-N(2)  | 2.026(2)        |                | 0.295           |                  |
| Cu(4)-N(16) | 2.528           |                | 0.076           |                  |

**Table S4.** The summary of the dimension, conformation of ligands, coordinated numbers of Cu and bridging modes of CN<sup>-</sup> anions in **1–5**

|                 | Compound | Ligands | Coordinated number of Cu | Dimension | Conformation of ligands                                                             | Schematic diagram of Cu and ligands                                                   | Bridging modes of CN <sup>-</sup> anion                                               |
|-----------------|----------|---------|--------------------------|-----------|-------------------------------------------------------------------------------------|---------------------------------------------------------------------------------------|---------------------------------------------------------------------------------------|
| Rigid ligand    | 1        | bbi     | 3                        | 1D        | 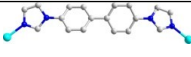   |    |    |
|                 | 5        | bib     | 3                        | 2D        |    |    |    |
|                 | 4        | bix     | 3,6                      | 3D        |    |    |    |
| Flexible ligand | 2        | bimb    | 3,6                      | 2D        |    |    |    |
|                 |          |         |                          |           |   |   |    |
|                 | 3        | dip     | 3,6                      | 3D        |  |  |  |
